# Supplementary material for: Dual targeted extracellular vesicles regulate oncogenic genes in advanced pancreatic cancer
Source: PubMed Central journal article supplement (PMC10593751; doi:10.1038/s41467-023-42402-3), 2023-10-23
Supplement: 41467_2023_42402_MOESM3_ESM.pdf [file 41467_2023_42402_MOESM3_ESM.pdf]

## **Description of Additional Supplementary Files**

**Supplementary Data 1 | Changes of EV microRNAs from TACE stimulated hBMSCs with or without TP53 plasmid.** More details can be found in GEO accession GSE223409.

**Supplementary Data 2 | Changes of EV microRNAs from TACE stimulated MEFs with or without TP53 plasmid.** More details can be found in GEO accession GSE223409.
